# Supplementary material
Source: MDPI journal article supplement (https://www.mdpi.com/2079-6412/11/4/460)
Supplement: s1 [file s1]

# A Dual Active-Passive Coating with Intumescent and Fire-Retardant Properties Based on High Molecular Weight Tannins

Francisco Solis-Pomar <sup>1</sup>, Andrés Díaz-Gómez <sup>2</sup>, María Elizabeth Berrío <sup>2</sup>, Jesús Ramírez <sup>2</sup>, Andrés Felipe Jaramillo <sup>3</sup>, Katherina Fernández <sup>4</sup>, David Rojas <sup>2</sup>, Manuel Francisco Melendrez <sup>2,5</sup> and Eduardo Pérez-Tijerina <sup>1,\*</sup>

<sup>1</sup> Facultad de Ciencias Físico-Matemáticas, Universidad Autónoma de Nuevo León, San Nicolas de los Garza, Nuevo León 66451, México; francisco.solispm@uanl.edu.mx

<sup>2</sup> Interdisciplinary Group of Applied Nanotechnology (GINA). Hybrid Materials Laboratory (HML). Department of Materials Engineering (DIMAT), Faculty of Engineering, University of Concepcion, 270 Edmundo Larenas, Box 160-C, Concepcion 4070409 Chile; andresdiaz.qind@gmail.com (A.D.-G.), alframirez09@gmail.com (J.R.), maelibeni2018@gmail.com (M.E.B.), davrojas@udec.cl (D.R.), luismontoya@udec.cl (L.F.M.); mmelendrez@udec.cl (M.F.M.)

<sup>3</sup> Departament of Mechanical Engineering, Universidad de La Frontera; 01145 Francisco Salazar, Temuco 4780000, Chile; andresfelipe.jaramillo@ufrontera.cl

<sup>4</sup> Laboratory of Biomaterials, Department of Chemical Engineering, Faculty of Engineering, University of Concepcion, Barrio Universitario s/n, P.O. Box 160-C, Concepción 4030000, Chile; kfernandez@udec.cl (K.F)

<sup>5</sup> Unidad de Desarrollo Tecnológico; 2634 Av. Cordillera, Parque Industrial Coronel, Box 4051, Concepción 4191996, Chile

\* Correspondence: eduardo.perezjt@uanl.edu.mx

**Table S1.** Variation of percentage compositions of PER, ME, and MAP on basic formulation.

| Component     | Variation (%) |      |      |      |
|---------------|---------------|------|------|------|
|               | BF1           | BF2  | BF3  | BF4  |
| Ratio MAP/PER | 2.8           | 1.9  | 1.5  | 0.8  |
| MAP           | 25.0          | 25.0 | 25.0 | 15.0 |
| PER           | 9.0           | 13.0 | 15.0 | 18.0 |
| ME            | 7.4           | 12.0 | 14.0 | 18.0 |

Preliminary studies: The percentage of each component was varied in order to verify which of these had the best intumescent and fire-retardant behavior before adding the tannin to the base formulation (BF).

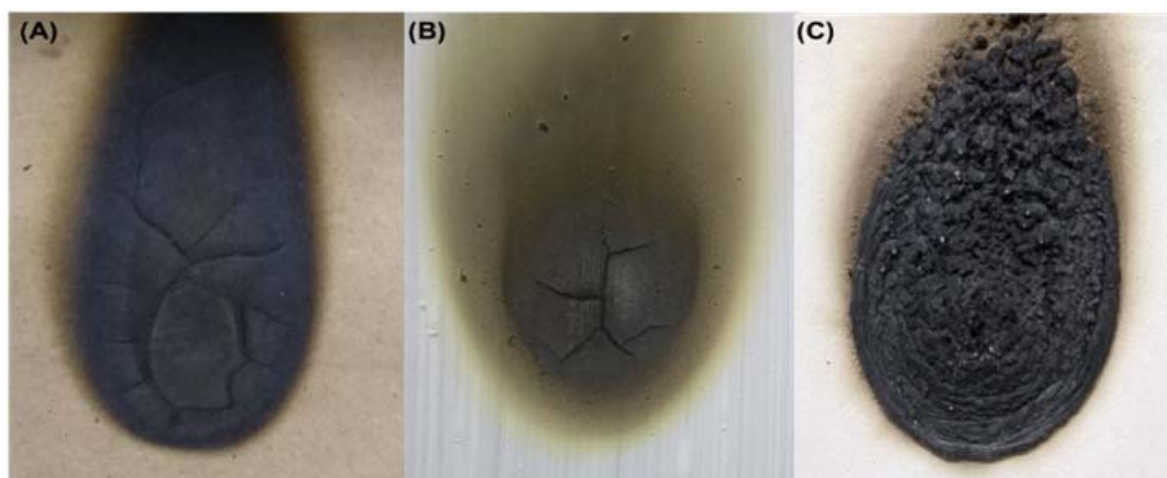

**Figure S1.** Fire response and foaming of (A) uncoated wood, (B) coating with SPP as catalyst (BF-SPP), and (C) MAP as catalyst (BF-MAP).

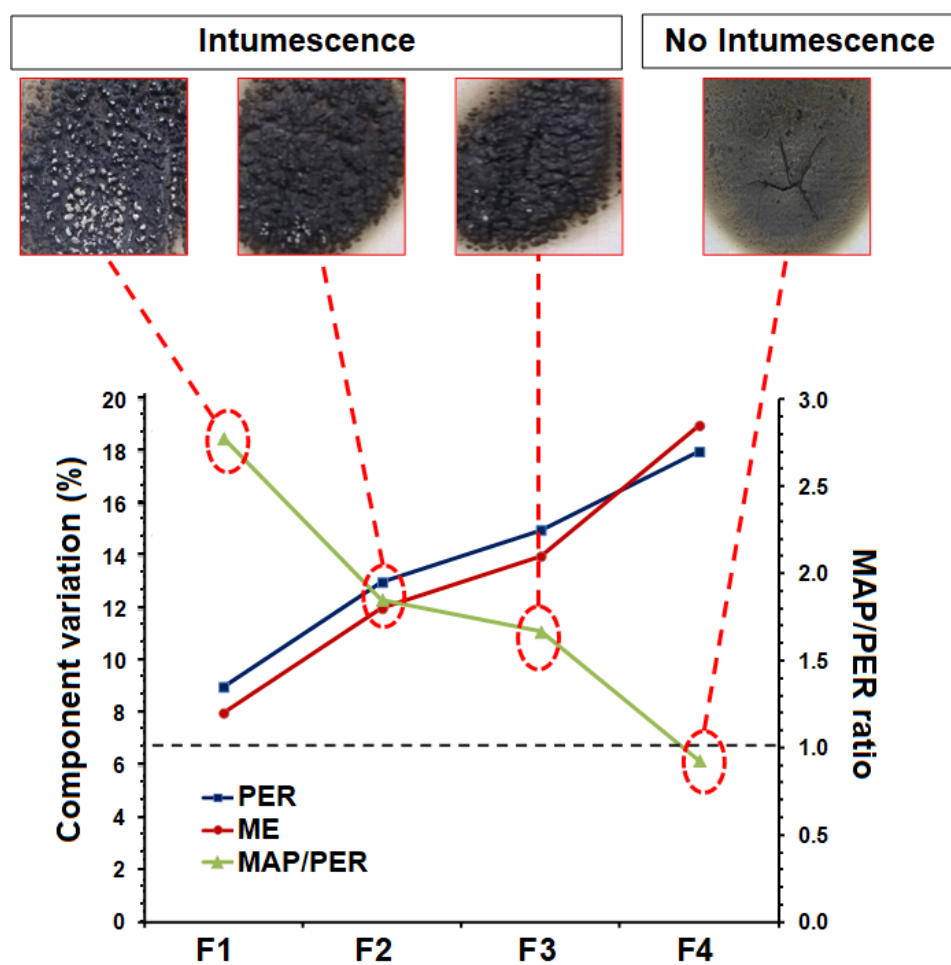

**Figure S2.** Intumescence properties according to the variation of the basic components of the formulation.

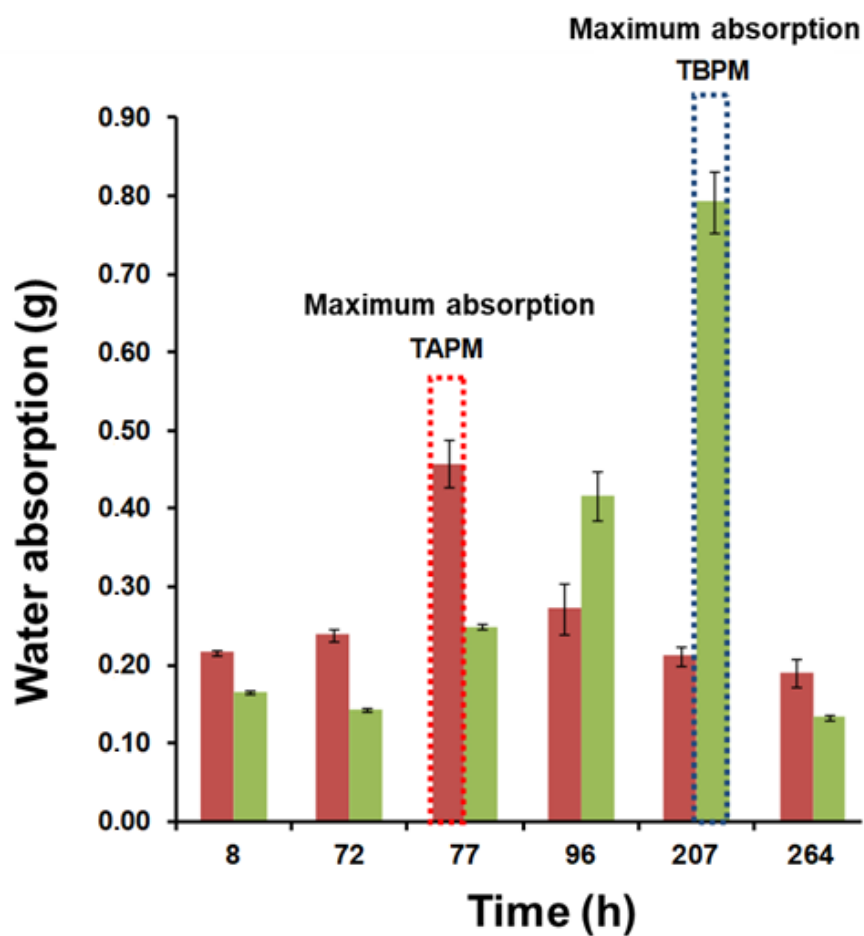

Figure S3. Water absorbed by H-MWT and L-MWT in periods between 8 and 264 h.

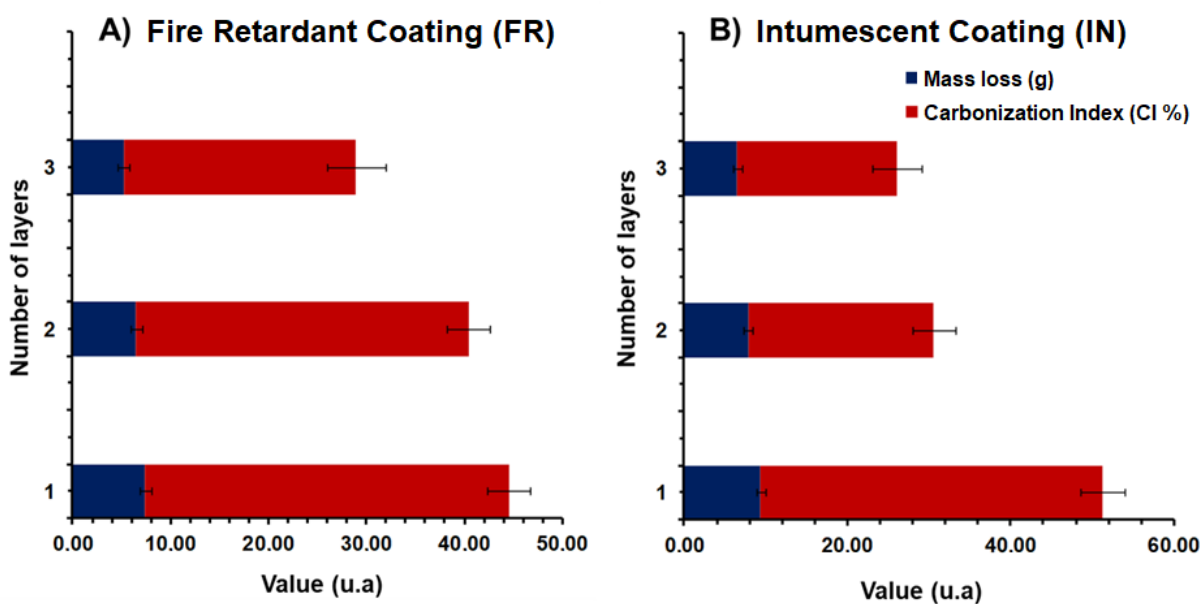

Figure S4. Mass loss and carbonization index of (A) intumescent (FT5) and (B) fire-retardant (FT1) coatings.

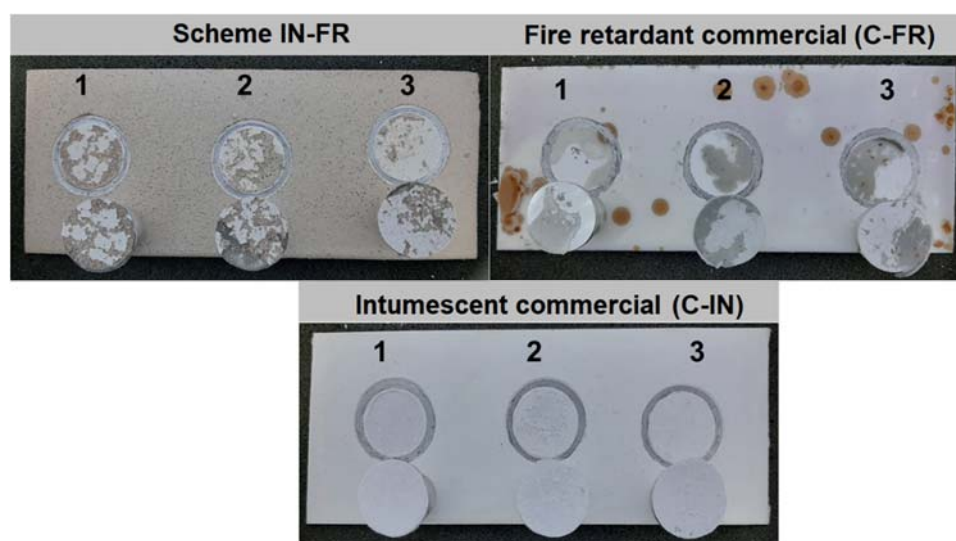

**Figure S5.** Resistance to detachment by adherence of the dual scheme on metal substrates with respect to the respective commercial coating.

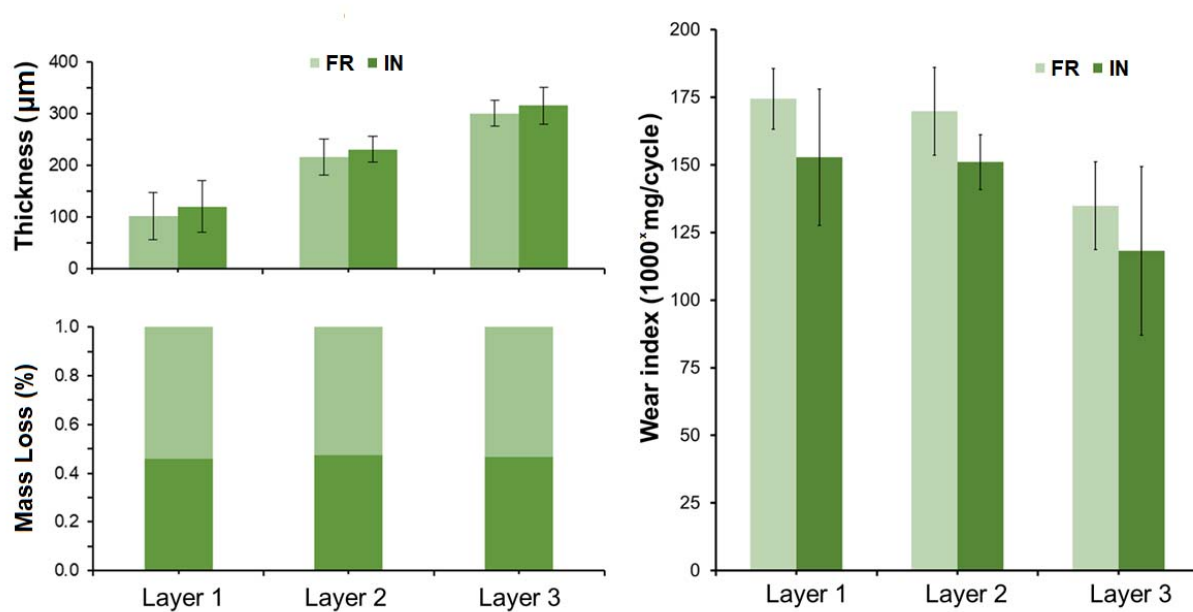

**Figure S6.** Abrasion test for fire retardant (FR) and intumescent (IN) coatings on metal with increasing thickness.
